# Supplementary material for: Ultralong afterglow of heavy-atom-free carbon dots with a phosphorescence lifetime of up to 3.7 s for encryption and fingerprinting description
Source: Royal Society of Chemistry journal article supplement (doi:10.1039/d4dt00053f), 2024-01-01
Supplement: d4dt00053f1.pdf [file d4dt00053f1.pdf]

## Supplementary Information

Ultralong afterglow of heavy-atom-free carbon dots with a phosphorescence lifetime of up to 3.7 s for encryption and fingerprinting description

Xinlei Zhang, Xia Liu, Peng Liu, Bohan Li, Yan Xu\*

*Department of Chemistry, College of Sciences, Northeastern University, Shenyang, Liaoning 110819, China.*

\*Corresponding Authors:

*xuyan@mail.neu.edu.cn (Yan Xu);*

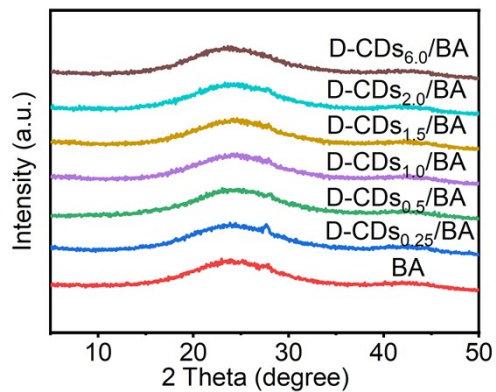

**Fig. S1.** The experimental PXRD patterns of as-prepared BA and D-CDs<sub>x</sub>/BA (X = 0.25, 0.5, 1.0, 1.5, 2.0, 6.0) samples.

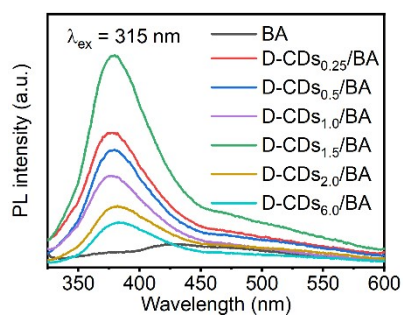

**Fig. S2.** Fluorescence emission spectra of D-CDs<sub>x</sub>/BA with different D-CDs contents.

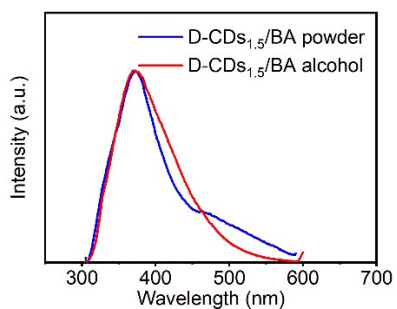

**Fig. S3.** Fluorescence emission spectra of D-CDs<sub>1.5</sub>/BA powder and in alcohol

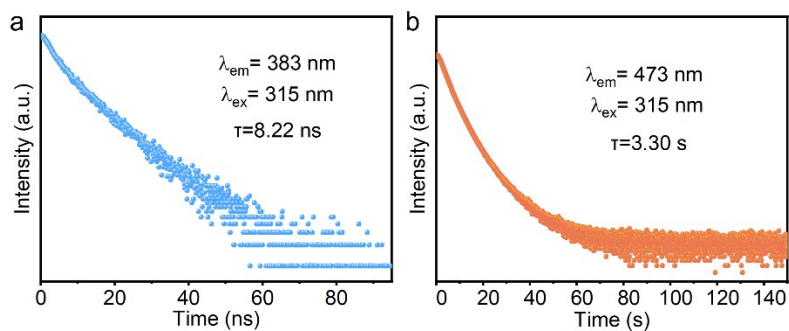

**Fig. S4.** Time-resolved delay spectra measured at (a) 383 nm and (b) 473 nm for different lifetimes.

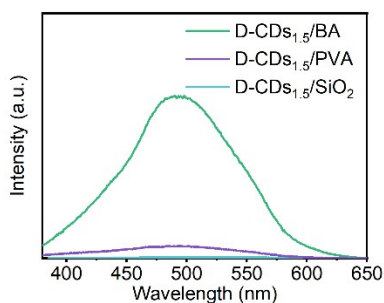

**Fig. S5.** Afterglow spectra of D-CDs mixed into different matrices.

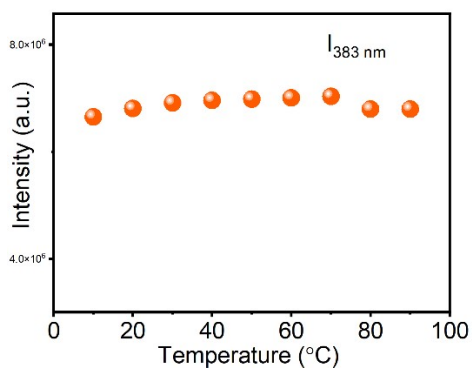

**Fig. S6.** Temperature-dependent emission intensity variation of D-CDs<sub>1.5</sub>/BA with excitation wavelength of 315 nm.

**Table S1** The time resolved phosphorescence decay components of the D-CDs<sub>1.5</sub>/BA

| Em. | Ex. | T1 (s) | A1   | A1' (%) | T <sub>avg</sub> (s) <sup>a</sup> |
|-----|-----|--------|------|---------|-----------------------------------|
| 473 | 315 | 3.30   | 7.60 | 100     | 3.30                              |
| 473 | 254 | 3.66   | 9.15 | 100     | 3.66                              |
| 473 | 365 | 2.78   | 9.43 | 100     | 2.78                              |

<sup>a</sup>The average lifetimes were calculated using the equation :

$$\tau_{\text{avg}} = (A_1' * \tau_1 * \tau_1) / (A_1' * \tau_1)$$

**Table S2** Comparison of lifetime of CD-based RTP materials under UV light

| Materials                 | Lifetime (s) | PQY (%) | References |
|---------------------------|--------------|---------|------------|
| <b>CDs and boric acid</b> | 3.66         | 12.67   | This work  |
| <b>CDs and PVA</b>        | 2.43         | 7.51    | 1          |
| <b>CDs and boric acid</b> | 2.26         | 17.5    | 2          |
| <b>CDs and urea</b>       | 0.21         | 30      | 3          |
| <b>CDs and boric acid</b> | 0.44         | 17.61   | 4          |

## References

1. D. Li, Y. Yang, J. Yang, M. Fang, B. Z. Tang and Z. Li, *Nat. Commun.*, 2022, **13**, 347-355.
2. W. Li, W. Zhou, Z. Zhou, H. Zhang, X. Zhang, J. Zhuang, Y. Liu, B. Lei and C. Hu, *Angew. Chem., Int. Ed.*, 2019, **58**, 7278-7283.
3. J. Tan, Z. Yi, Y. Ye, X. Ren and Q. Li, *J. Lumin.*, 2020, **223**, 117267-11774.
4. W. He, X. Sun and X. Cao, *ACS Sustain. Chem. Eng.*, 2021, **9**, 4477-4486.
